# Supplementary material for: Paired refinement under the control of PAIREF
Source: PubMed Central journal article supplement (PMC7340264; doi:10.1107/s2052252520005916), 2020-06-10
Supplement: m-07-00681-sup1.pdf [file m-07-00681-sup1.pdf]

# IUCrJ

**Volume 7 (2020)**

**Supporting information for article:**

**Paired refinement under the control of *PAIREF***

**Martin Malý, Kay Diederichs, Jan Dohnálek and Petr Kolenko**

All the refinement runs presented in this paper were performed with *REFMAC5* version 5.8.258.

Installation of *PAIREF*:

*PAIREF* depends on the *CCP4* package. Run a following command in Unix shell (GNU/Linux, MacOS) or in *CCP4CONSOLE* (MS Windows):

```
cctbx.python -m pip install pairef --user --no-deps
```

## S1 Simulated data set of lysozyme (SIM)

Perturbation of the reference structure model:

```
phenix.pdbtools set_b_iso=15 shake=0.25 1H87_single.pdb
file_name=1H87_single_shaken.pdb
```

Run with a resolution shell width of 0.10 Å (Fig. 2a-c):

```
cctbx.python -m pairef --XYZIN 1H87_single_shaken.pdb --HKLIN 1H87_dui_R.mtz -u
1H87_dui_unmerged.mtz -i 1.72 -r 1.6,1.5,1.4,1.3,1.2 --prerefinement-ncyc 13 --ncyc 6
-p 1H87_dui
```

| # Shell (Å)  | Rwork(init) | Rwork(fin) | Rwork(diff) | Rfree(init) | Rfree(fin) | Rfree(diff) |
|--------------|-------------|------------|-------------|-------------|------------|-------------|
| 1.72A->1.60A | 0.0609      | 0.0592     | -0.0017     | 0.0712      | 0.0681     | -0.0031     |
| 1.60A->1.50A | 0.0655      | 0.0653     | -0.0002     | 0.0746      | 0.0734     | -0.0012     |
| 1.50A->1.40A | 0.0733      | 0.0733     | 0.0000      | 0.0812      | 0.0805     | -0.0007     |
| 1.40A->1.30A | 0.0848      | 0.0847     | -0.0001     | 0.0938      | 0.0935     | -0.0003     |
| 1.30A->1.20A | 0.1047      | 0.1049     | 0.0002      | 0.1112      | 0.1113     | 0.0001      |

RMS coordinates differences were calculated in PyMOL using function `rms_cur()`.

RMS of ADP differences were calculated according to formula

$$RMSD_{ADP} = \sqrt{\frac{\sum_{i=1}^N [B_{1,i} - \overline{B_1} - B_{2,i} + \overline{B_2}]^2}{N}}$$

where both structure models consist of  $N$  atoms with ADPs  $B_{1,1}, B_{1,2}, \dots, B_{1,N}$ , and  $B_{2,1}, B_{2,2}, \dots, B_{2,N}$ . Bars denote average values.

Merging statistics in resolution bins:

| #shell | d_max | d_min | #obs  | #uniq | mult. | %comp  | <I>   | <I/sI> | r_mrg | r_meas | r_pim | cc1/2 | cc_ano | cc*    |
|--------|-------|-------|-------|-------|-------|--------|-------|--------|-------|--------|-------|-------|--------|--------|
| 01     | 38.62 | 3.43  | 11225 | 1756  | 6.39  | 99.83  | 725.8 | 27.2   | 0.060 | 0.066  | 0.027 | 0.985 | 0.207  | 0.9962 |
| 02     | 3.43  | 2.43  | 20639 | 2965  | 6.96  | 99.83  | 264.6 | 18.8   | 0.059 | 0.064  | 0.024 | 0.997 | 0.618  | 0.9992 |
| 03     | 2.43  | 1.98  | 25070 | 3846  | 6.52  | 100.00 | 108.4 | 9.5    | 0.105 | 0.114  | 0.043 | 0.988 | 0.404  | 0.9970 |
| 04     | 1.98  | 1.72  | 30516 | 4336  | 7.04  | 99.93  | 40.8  | 4.0    | 0.235 | 0.254  | 0.094 | 0.971 | 0.156  | 0.9926 |
| 05     | 1.72  | 1.60  | 19736 | 3054  | 6.46  | 100.00 | 20.7  | 2.0    | 0.431 | 0.468  | 0.180 | 0.901 | 0.080  | 0.9736 |
| 06     | 1.60  | 1.50  | 19671 | 3305  | 5.95  | 99.70  | 13.1  | 1.1    | 0.731 | 0.800  | 0.317 | 0.752 | 0.008  | 0.9265 |
| 07     | 1.50  | 1.40  | 23094 | 4325  | 5.34  | 99.61  | 8.9   | 0.6    | 1.110 | 1.230  | 0.515 | 0.513 | 0.024  | 0.8235 |
| 08     | 1.40  | 1.30  | 16791 | 5345  | 3.14  | 93.44  | 5.3   | 0.3    | 1.890 | 2.233  | 1.153 | 0.179 | 0.021  | 0.5510 |
| 09     | 1.30  | 1.20  | 3690  | 2566  | 1.44  | 33.03  | 2.7   | 0.1    | 3.379 | 4.476  | 2.900 | 0.034 | -0.384 | 0.2564 |

## S2 Thermolysin (TL)

Run with a resolution shell width of 0.10 Å (Fig. 2d-e):

```
cctbx.python -m pairef --XYZIN 3n21_edit05_refmac1.pdb --HKLIN
AUTOMATIC_DEFAULT_free_R.mtz -u AUTOMATIC_DEFAULT_scaled_unmerged.mtz -i 1.80 -n 5 -s
0.10 -p TL_step0-10A
```

Run with a resolution shell width of 0.01 Å (Fig. 2f):

```
cctbx.python -m pairef --XYZIN 3n21_edit05_refmac1.pdb --HKLIN
AUTOMATIC_DEFAULT_free_R.mtz -u AUTOMATIC_DEFAULT_scaled_unmerged.mtz -i 1.80 -n 49 -s
0.01 -p TL_step0-01A
```

### Merging statistics in resolution bins:

| #shell | d_max | d_min | #obs   | #uniq | mult. | %comp  | <I>  | <I/sI> | r_mrg  | r_meas | r_pim | cc1/2 | cc_ano | cc*    |
|--------|-------|-------|--------|-------|-------|--------|------|--------|--------|--------|-------|-------|--------|--------|
| 01     | 79.99 | 4.77  | 125965 | 1832  | 68.76 | 100.00 | 26.5 | 56.8   | 0.071  | 0.072  | 0.008 | 1.000 | 0.700  | 1.0000 |
| 02     | 4.77  | 3.37  | 232091 | 3108  | 74.68 | 99.97  | 28.4 | 56.4   | 0.088  | 0.089  | 0.010 | 1.000 | 0.503  | 1.0000 |
| 03     | 3.37  | 2.75  | 301747 | 3938  | 76.62 | 99.92  | 11.7 | 33.1   | 0.150  | 0.151  | 0.017 | 0.999 | 0.355  | 0.9997 |
| 04     | 2.75  | 2.38  | 342932 | 4589  | 74.73 | 99.59  | 5.0  | 19.5   | 0.255  | 0.257  | 0.029 | 0.997 | 0.231  | 0.9992 |
| 05     | 2.38  | 2.13  | 396759 | 5102  | 77.77 | 99.20  | 2.8  | 13.4   | 0.379  | 0.381  | 0.042 | 0.994 | 0.147  | 0.9985 |
| 06     | 2.13  | 1.94  | 427018 | 5775  | 73.94 | 98.79  | 1.5  | 8.4    | 0.595  | 0.599  | 0.068 | 0.986 | 0.049  | 0.9965 |
| 07     | 1.94  | 1.80  | 455635 | 5900  | 77.23 | 98.38  | 0.6  | 4.8    | 1.040  | 1.046  | 0.117 | 0.965 | 0.052  | 0.9911 |
| 08     | 1.80  | 1.70  | 403806 | 5435  | 74.30 | 97.96  | 0.3  | 2.8    | 1.741  | 1.753  | 0.200 | 0.723 | 0.010  | 0.9161 |
| 09     | 1.70  | 1.60  | 517662 | 6831  | 75.78 | 97.47  | 0.2  | 1.6    | 2.872  | 2.891  | 0.326 | 0.657 | 0.022  | 0.8905 |
| 10     | 1.60  | 1.50  | 510558 | 8252  | 61.87 | 91.80  | 0.1  | 0.8    | 4.789  | 4.828  | 0.598 | 0.445 | 0.009  | 0.7848 |
| 11     | 1.50  | 1.40  | 299987 | 7139  | 42.02 | 61.05  | 0.0  | 0.2    | 9.608  | 9.727  | 1.445 | 0.077 | 0.023  | 0.3781 |
| 12     | 1.40  | 1.31  | 84121  | 4154  | 20.25 | 32.19  | 0.0  | -0.1   | 20.319 | 20.855 | 4.431 | 0.019 | 0.010  | 0.1931 |

## S3 Cysteine dioxygenase (CDO)

Run with a resolution shell width of 0.10 Å - free flag 0 (Fig. 2g-h):

```
cctbx.python -m pairef --HKLIN CDO_R.mtz --XYZIN 2B5H_edit_refmac1.pdb -u XDS_ASCII.HKL -i 2 -r 1.9,1.8,1.7,1.6,1.5,1.42 -p CDO_step0-10A
```

Run with a resolution shell width of 0.01 Å - free flag 0 (Fig. 2i):

```
cctbx.python -m pairef --HKLIN CDO_R.mtz --XYZIN 2B5H_edit_refmac1.pdb -u XDS_ASCII.HKL -i 2 -s 0.01 -n 58 -p CDO_step0-01A
```

Run with a resolution shell width of 0.10 Å - complete cross-validation (Fig. 2j-l):

```
cctbx.python -m pairef --HKLIN CDO_R.mtz --XYZIN 2B5H_edit_refmac1.pdb -u XDS_ASCII.HKL -i 2 -r 1.9,1.8,1.7,1.6,1.5,1.42 --complete --prerefinement-ncyc 20 --prerefinement-shake-sites 0.25 --prerefinement-reset-bfactor -p CDO_step0-10A_complete
```

Merging statistics in resolution bins:

| #shell | d_max | d_min | #obs  | #uniq | mult. | %comp  | <I>   | <I/sI> | r_mrg | r_meas | r_pim | cc1/2 | cc_ano | cc*    |
|--------|-------|-------|-------|-------|-------|--------|-------|--------|-------|--------|-------|-------|--------|--------|
| 01     | 41.96 | 3.98  | 30502 | 2013  | 15.15 | 100.00 | 509.9 | 92.4   | 0.029 | 0.030  | 0.008 | 1.000 | 0.444  | 1.0000 |
| 02     | 3.98  | 2.83  | 55734 | 3335  | 16.71 | 100.00 | 382.3 | 74.0   | 0.048 | 0.049  | 0.012 | 1.000 | 0.178  | 1.0000 |
| 03     | 2.83  | 2.31  | 73318 | 4261  | 17.21 | 100.00 | 152.2 | 40.9   | 0.127 | 0.131  | 0.031 | 0.999 | 0.046  | 0.9997 |
| 04     | 2.31  | 2.00  | 86730 | 5014  | 17.30 | 100.00 | 100.2 | 23.4   | 0.254 | 0.261  | 0.062 | 0.997 | 0.009  | 0.9992 |
| 05     | 2.00  | 1.90  | 40614 | 2360  | 17.21 | 100.00 | 60.5  | 13.0   | 0.412 | 0.425  | 0.101 | 0.993 | -0.011 | 0.9982 |
| 06     | 1.90  | 1.80  | 48612 | 2886  | 16.84 | 100.00 | 31.9  | 6.8    | 0.577 | 0.595  | 0.144 | 0.976 | 0.015  | 0.9939 |
| 07     | 1.80  | 1.70  | 60936 | 3619  | 16.84 | 100.00 | 16.1  | 3.5    | 0.854 | 0.881  | 0.214 | 0.933 | 0.108  | 0.9825 |
| 08     | 1.70  | 1.60  | 65470 | 4548  | 14.40 | 100.00 | 8.9   | 1.9    | 1.251 | 1.297  | 0.340 | 0.783 | 0.144  | 0.9372 |
| 09     | 1.60  | 1.50  | 60309 | 5862  | 10.29 | 100.00 | 4.9   | 0.9    | 2.023 | 2.130  | 0.653 | 0.441 | -0.021 | 0.7824 |
| 10     | 1.50  | 1.42  | 27549 | 5842  | 4.72  | 98.83  | 2.9   | 0.3    | 3.175 | 3.557  | 1.527 | 0.074 | 0.004  | 0.3712 |

## S4 Endothiapepsin in complex with fragment B53 (EP)

Perturbation of the structure model:

```
phenix.pdbtools set_b_iso=16 shake=0.25 4Y4G_noW_noLIG.pdb
file_name=4Y4G_noW_noLIG_shaken.pdb
```

Run with a resolution shell width of 0.05 Å (Fig. 3a-c):

```
cctbx.python -m pairef --XYZIN 4Y4G_noW_noLIG_shaken.pdb --HKLIN EP_R.mtz -u XDS_ASCII.HKL -i 1.44 -r 1.35,1.30,1.25,1.20,1.15,1.10,1.05 --prerefinement-ncyc 15 -p EP
```

Merging statistics in resolution bins:

| #shell | d_max | d_min | #obs  | #uniq | mult. | %comp | <I>   | <I/sI> | r_mrg | r_meas | r_pim | cc1/2 | cc_ano | cc*    |
|--------|-------|-------|-------|-------|-------|-------|-------|--------|-------|--------|-------|-------|--------|--------|
| 01     | 42.68 | 4.77  | 6511  | 1646  | 3.96  | 99.58 | 198.1 | 41.3   | 0.024 | 0.027  | 0.013 | 0.999 | -0.001 | 0.9997 |
| 02     | 4.77  | 3.37  | 10618 | 2984  | 3.56  | 99.60 | 269.3 | 36.7   | 0.025 | 0.030  | 0.015 | 0.999 | -0.098 | 0.9997 |
| 03     | 3.37  | 2.75  | 14924 | 3814  | 3.91  | 99.17 | 112.3 | 26.3   | 0.040 | 0.046  | 0.023 | 0.998 | -0.031 | 0.9995 |
| 04     | 2.75  | 2.38  | 17054 | 4492  | 3.80  | 98.99 | 55.7  | 17.9   | 0.059 | 0.068  | 0.034 | 0.996 | 0.016  | 0.9990 |
| 05     | 2.38  | 2.14  | 17117 | 4812  | 3.56  | 98.61 | 41.7  | 13.8   | 0.074 | 0.087  | 0.045 | 0.993 | 0.031  | 0.9982 |
| 06     | 2.14  | 1.95  | 21801 | 5624  | 3.88  | 98.36 | 29.6  | 11.5   | 0.094 | 0.110  | 0.055 | 0.990 | 0.013  | 0.9975 |
| 07     | 1.95  | 1.80  | 24698 | 6237  | 3.96  | 98.10 | 15.4  | 7.3    | 0.156 | 0.180  | 0.089 | 0.976 | 0.013  | 0.9939 |
| 08     | 1.80  | 1.69  | 23067 | 6065  | 3.80  | 97.78 | 8.6   | 4.5    | 0.245 | 0.285  | 0.144 | 0.941 | 0.044  | 0.9847 |
| 09     | 1.69  | 1.59  | 25972 | 7046  | 3.69  | 97.40 | 5.5   | 3.0    | 0.361 | 0.423  | 0.217 | 0.871 | 0.043  | 0.9649 |
| 10     | 1.59  | 1.51  | 27217 | 6983  | 3.90  | 96.78 | 3.9   | 2.3    | 0.490 | 0.568  | 0.284 | 0.822 | 0.041  | 0.9499 |
| 11     | 1.51  | 1.44  | 29343 | 7460  | 3.93  | 96.32 | 2.8   | 1.7    | 0.672 | 0.777  | 0.385 | 0.694 | 0.035  | 0.9052 |
| 12     | 1.44  | 1.35  | 44398 | 11896 | 3.73  | 96.04 | 1.9   | 1.1    | 0.967 | 1.128  | 0.573 | 0.521 | 0.020  | 0.8277 |
| 13     | 1.35  | 1.30  | 30329 | 8072  | 3.76  | 95.49 | 1.3   | 0.7    | 1.359 | 1.585  | 0.806 | 0.385 | 0.032  | 0.7456 |
| 14     | 1.30  | 1.25  | 36280 | 9338  | 3.89  | 95.05 | 1.0   | 0.6    | 1.728 | 2.003  | 1.002 | 0.288 | 0.032  | 0.6687 |
| 15     | 1.25  | 1.20  | 42646 | 10944 | 3.90  | 94.61 | 0.8   | 0.5    | 2.158 | 2.500  | 1.247 | 0.225 | 0.038  | 0.6061 |
| 16     | 1.20  | 1.15  | 47423 | 12864 | 3.69  | 94.05 | 0.6   | 0.3    | 2.764 | 3.235  | 1.656 | 0.156 | 0.038  | 0.5195 |
| 17     | 1.15  | 1.10  | 58651 | 15099 | 3.88  | 93.26 | 0.5   | 0.2    | 3.569 | 4.138  | 2.070 | 0.099 | 0.037  | 0.4245 |
| 18     | 1.10  | 1.05  | 54538 | 15315 | 3.56  | 79.14 | 0.2   | 0.1    | 5.979 | 6.987  | 3.564 | 0.042 | 0.025  | 0.2839 |

## S5 Interferon gamma (POLI)

Run with a resolution shell width of 0.1 Å (Fig. 3d-f):

```
cctbx.python -m pairef --XYZIN poli67_edit12_refmac1.pdb --HKLIN poli67_R.mtz -u
XDS_ASCII.HKL -i 2.3 -s 0.1 -n 4 --ncyc 10 --prerefinement-ncyc 10 -w 0.06 -p poli67
```

### Merging statistics in resolution bins:

| #shell | d_max | d_min | #obs  | #uniq | mult. | %comp | <I>   | <I/sI> | r_mrg  | r_meas | r_pim  | cc1/2  | cc_ano | cc*    |
|--------|-------|-------|-------|-------|-------|-------|-------|--------|--------|--------|--------|--------|--------|--------|
| 01     | 47.32 | 5.13  | 22369 | 1949  | 11.48 | 99.44 | 494.0 | 38.8   | 0.042  | 0.044  | 0.013  | 0.999  | -0.214 | 0.9997 |
| 02     | 5.13  | 3.63  | 42232 | 3343  | 12.63 | 99.79 | 203.3 | 31.7   | 0.064  | 0.067  | 0.019  | 0.999  | -0.163 | 0.9997 |
| 03     | 3.63  | 2.97  | 57138 | 4246  | 13.46 | 99.95 | 56.9  | 14.3   | 0.151  | 0.157  | 0.042  | 0.997  | -0.166 | 0.9992 |
| 04     | 2.97  | 2.57  | 65007 | 5014  | 12.97 | 99.70 | 11.3  | 4.0    | 0.622  | 0.648  | 0.178  | 0.951  | -0.025 | 0.9874 |
| 05     | 2.57  | 2.30  | 73887 | 5623  | 13.14 | 99.89 | 3.7   | 1.3    | 1.839  | 1.914  | 0.523  | 0.730  | -0.014 | 0.9187 |
| 06     | 2.30  | 2.20  | 37405 | 2818  | 13.27 | 99.93 | 1.6   | 0.6    | 4.462  | 4.641  | 1.263  | 0.400  | 0.033  | 0.7559 |
| 07     | 2.20  | 2.10  | 45724 | 3363  | 13.60 | 99.91 | 0.9   | 0.3    | 7.623  | 7.920  | 2.129  | 0.196  | -0.008 | 0.5725 |
| 08     | 2.10  | 2.00  | 49772 | 4021  | 12.38 | 98.51 | 0.3   | 0.1    | 16.989 | 17.721 | 4.963  | 0.027  | 0.008  | 0.2293 |
| 09     | 2.00  | 1.90  | 35920 | 4046  | 8.88  | 81.18 | 0.1   | 0.0    | 41.435 | 43.993 | 14.417 | -0.132 | -0.016 | N/A    |

## S6 Bilirubin oxidase (BO)

Run with a resolution shell width of 0.1 Å (Fig. 3g-h):

```
cctbx.python -m pairef --XYZIN BO_edit94_refmac1.pdb --HKLIN BO_R.mtz -u XDS_ASCII.HKL
--LIBIN merge_TRP-HIS_FC6.cif -c setting.com -r 2.5,2.4,2.3 -w 0.048 --prerefinement-
ncyc 10 -p BO
```

The file setting.com includes:

```
# Hexacyanoferrate ligand definition in the working file.
# Residue numbers correspond to A613 to A616 and B611 to B615 in structure with PDB ID 6I3J, i.e. before
# renumbering in deposition
external harmonic residues from 801 A to 804 A sigma 0.03
external harmonic residues from 801 B to 805 B sigma 0.03
# protein residues
external harmonic residues from 139 B to 139 B sigma 0.01
external harmonic residues from 274 B to 274 B sigma 0.01
exte dist first chain A resi 463 atom CD second chain A resi 463 atom OE1 value 1.25 sigma 0.02
exte dist first chain B resi 492 atom CD second chain B resi 492 atom OE1 value 1.25 sigma 0.02
exte dist first chain A resi 503 atom CD second chain A resi 503 atom OE1 value 1.25 sigma 0.02
exte dist first chain B resi 143 atom CD second chain B resi 143 atom OE2 value 1.25 sigma 0.02
```

Run with a resolution shell width of 0.1 Å (2.8 Å resolution as a starting resolution):

```
cctbx.python -m pairef --XYZIN BO_edit94_refmac1.pdb --HKLIN BO_R.mtz -u XDS_ASCII.HKL
--LIBIN merge_TRP-HIS_FC6.cif -c setting.com -i 2.8 -r 2.7,2.6,2.5,2.4,2.3 -w 0.048 --
prerefinement-ncyc 10 --prerefinement-shake-sites 0.02 --prerefinement-reset-bfactor -
p BO_from2-80A
```

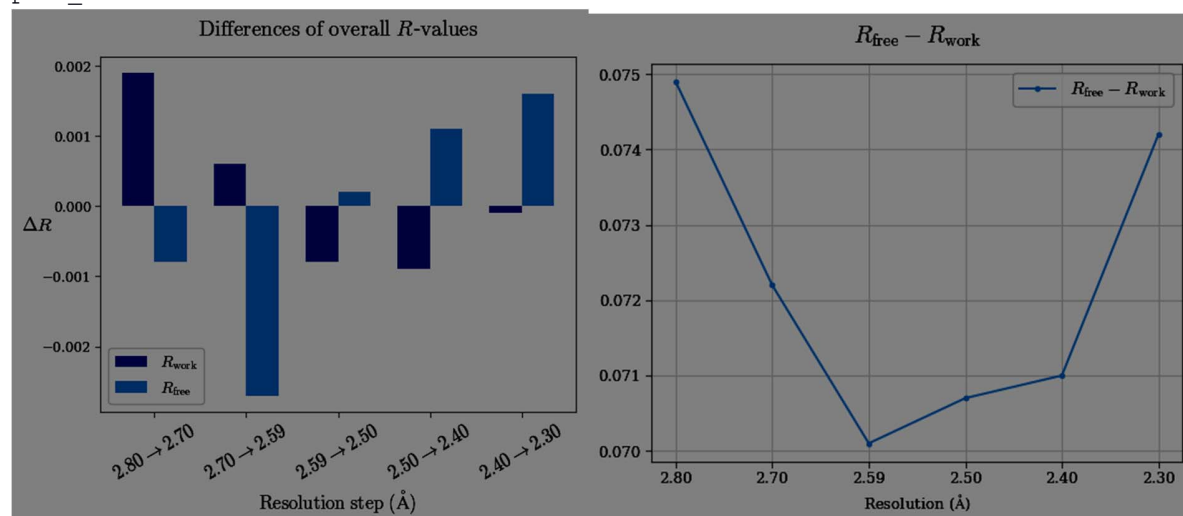

Merging statistics in resolution bins:

| #shell | d_max | d_min | #obs  | #uniq | mult. | %comp  | <I>   | <I/sI> | r_mrg | r_meas | r_pim | cc1/2 | cc_ano | cc*    |
|--------|-------|-------|-------|-------|-------|--------|-------|--------|-------|--------|-------|-------|--------|--------|
| 01     | 47.35 | 8.03  | 13105 | 1720  | 7.62  | 99.59  | 384.0 | 40.9   | 0.038 | 0.040  | 0.014 | 0.999 | 0.214  | 0.9997 |
| 02     | 8.03  | 5.73  | 23998 | 2921  | 8.22  | 100.00 | 193.6 | 28.5   | 0.063 | 0.067  | 0.023 | 0.998 | 0.092  | 0.9995 |
| 03     | 5.73  | 4.74  | 28851 | 3458  | 8.34  | 100.00 | 242.6 | 29.1   | 0.061 | 0.065  | 0.022 | 0.998 | 0.034  | 0.9995 |
| 04     | 4.74  | 4.10  | 36579 | 4349  | 8.41  | 100.00 | 258.3 | 27.6   | 0.065 | 0.070  | 0.024 | 0.998 | 0.016  | 0.9995 |
| 05     | 4.10  | 3.66  | 41914 | 4954  | 8.46  | 100.00 | 193.4 | 21.0   | 0.090 | 0.096  | 0.033 | 0.997 | -0.002 | 0.9992 |
| 06     | 3.66  | 3.34  | 45996 | 5418  | 8.49  | 99.98  | 121.4 | 14.0   | 0.145 | 0.154  | 0.052 | 0.993 | 0.019  | 0.9982 |
| 07     | 3.34  | 3.09  | 50156 | 5898  | 8.50  | 100.00 | 73.1  | 8.6    | 0.247 | 0.263  | 0.089 | 0.984 | 0.017  | 0.9960 |
| 08     | 3.09  | 2.89  | 53641 | 6305  | 8.51  | 100.00 | 44.5  | 5.5    | 0.396 | 0.421  | 0.143 | 0.960 | 0.011  | 0.9897 |
| 09     | 2.89  | 2.73  | 54665 | 6426  | 8.51  | 100.00 | 27.6  | 3.4    | 0.650 | 0.691  | 0.235 | 0.891 | 0.016  | 0.9708 |
| 10     | 2.73  | 2.59  | 50143 | 7020  | 7.14  | 100.00 | 18.1  | 2.0    | 0.942 | 1.017  | 0.377 | 0.728 | -0.006 | 0.9179 |
| 11     | 2.59  | 2.50  | 27420 | 5353  | 5.12  | 99.79  | 13.5  | 1.2    | 1.198 | 1.338  | 0.584 | 0.524 | 0.025  | 0.8293 |
| 12     | 2.50  | 2.40  | 27592 | 6777  | 4.07  | 97.54  | 11.2  | 0.9    | 1.396 | 1.613  | 0.785 | 0.283 | 0.008  | 0.6642 |
| 13     | 2.40  | 2.30  | 24246 | 7300  | 3.32  | 89.13  | 8.7   | 0.6    | 1.795 | 2.145  | 1.140 | 0.176 | 0.007  | 0.5471 |

## S7 Impact of the model quality

### S7.1 EP data set

Run with model after molecular replacement using a penicillopepsin structure (Fig 4a):

```
cctbx.python -m pairef --XYZIN EP_afterMR_2WEA.pdb --HKLIN EP_R.mtz -u XDS_ASCII.HKL -i 1.45 -n 7 -s 0.05 --ncyc 10 --prerefinement-ncyc 250 --prerefinement-reset-bfactor --prerefinement-shake-sites 0.25 -p EP_afterMR_2WEA
```

Run with protein model as built by *ARP/wARP* (Fig 4b):

```
cctbx.python -m pairef --XYZIN EP_protein_chain_ARPwARP.pdb --HKLIN EP_R.mtz -u XDS_ASCII.HKL -i 1.45 -n 7 -s 0.05 --ncyc 10 --prerefinement-ncyc 250 --prerefinement-reset-bfactor --prerefinement-shake-sites 0.25 -p EP_protein_chain_ARPwARP
```

Run with original model of endothiaepsin without solvent molecules (Fig 4c):

```
cctbx.python -m pairef --XYZIN 4Y4G_noW_noLIG.pdb --HKLIN EP_R.mtz -u XDS_ASCII.HKL -i 1.45 -n 7 -s 0.05 --ncyc 10 --prerefinement-ncyc 250 --prerefinement-reset-bfactor --prerefinement-shake-sites 0.25 -p EP_noW_noLIG
```

Run with deposited structure of endothiaepsin - PDB id 4Y4G (Fig 4d):

```
cctbx.python -m pairef --XYZIN 4Y4G.pdb --HKLIN EP_R.mtz -u XDS_ASCII.HKL -i 1.45 -n 7 -s 0.05 --ncyc 10 --prerefinement-ncyc 250 --prerefinement-reset-bfactor --prerefinement-shake-sites 0.25 -p EP_4Y4G
```

### S7.2 POLI data set

Run with poly-Ala model as built by *SHELXE* (Fig 4e):

```
Poly-Ala  
cctbx.python -m pairef --XYZIN poli67-poliAla.pdb --HKLIN poli67_R.mtz -u XDS_ASCII.HKL -i 2.3 -s 0.1 -n 4 --ncyc 10 --prerefinement-ncyc 55 --ncyc 60 -p poli67-poliAla
```

Run with protein model without solvent molecules (Fig 4f):

```
No waters  
cctbx.python -m pairef --XYZIN poli67-noW.pdb --HKLIN poli67_R.mtz -u XDS_ASCII.HKL -i 2.3 -s 0.1 -n 4 --ncyc 10 --prerefinement-ncyc 10 --ncyc 10 -w 0.06 -p poli67-nowaters
```
